# Supplementary material for: The Role of Social Media in Sports Vision
Source: MDPI journal article supplement (doi:10.3390/ijerph18105354), 2021-05-18
Supplement: s1 [file s1]

A)

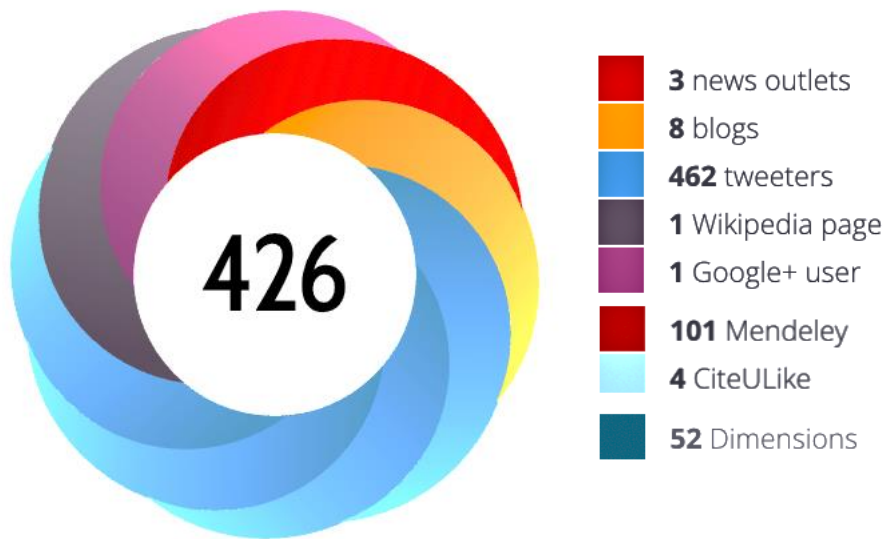

B)

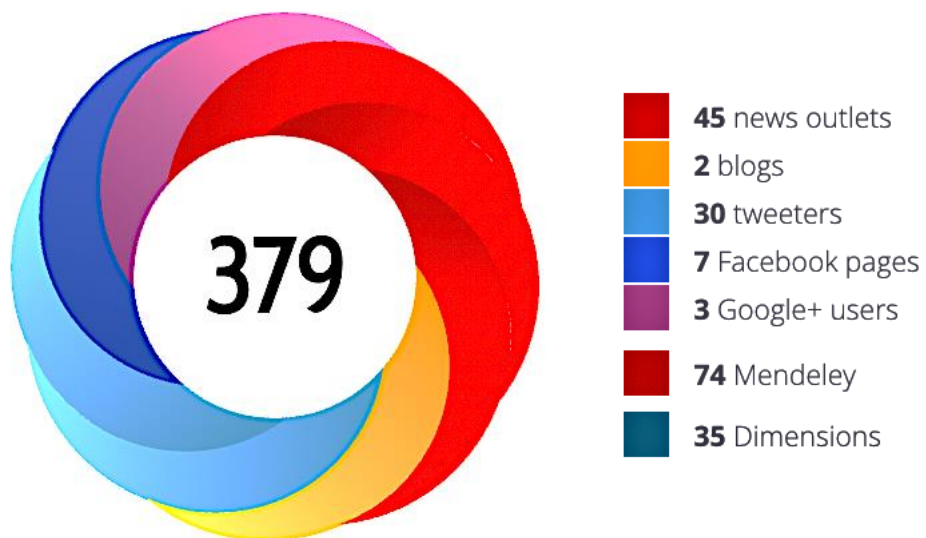

C)

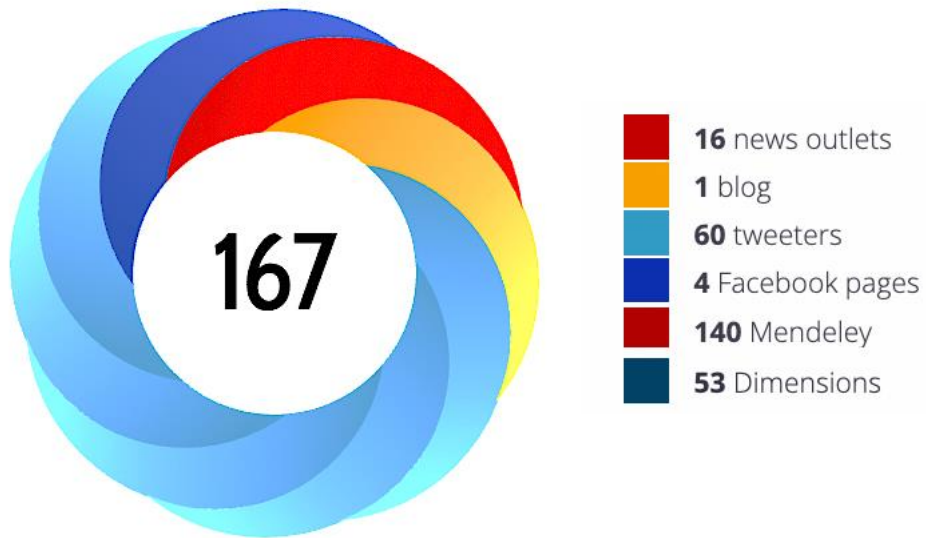

D)

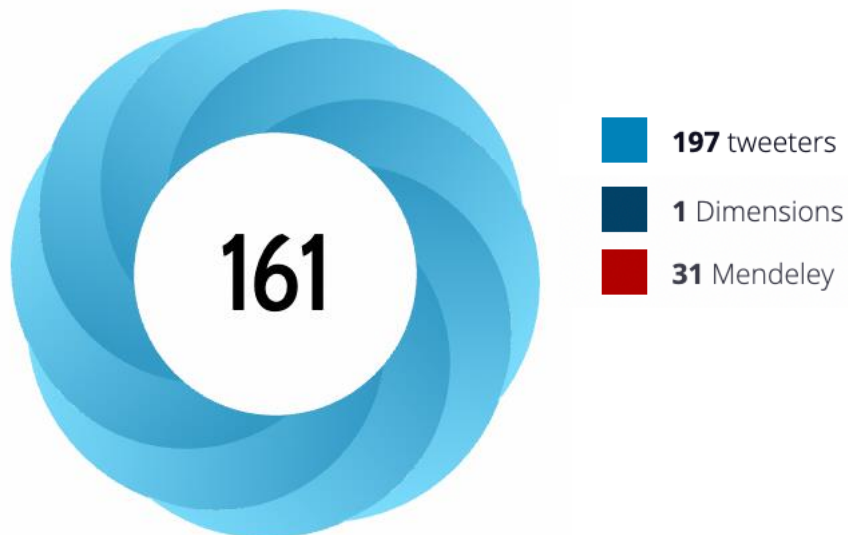

E)

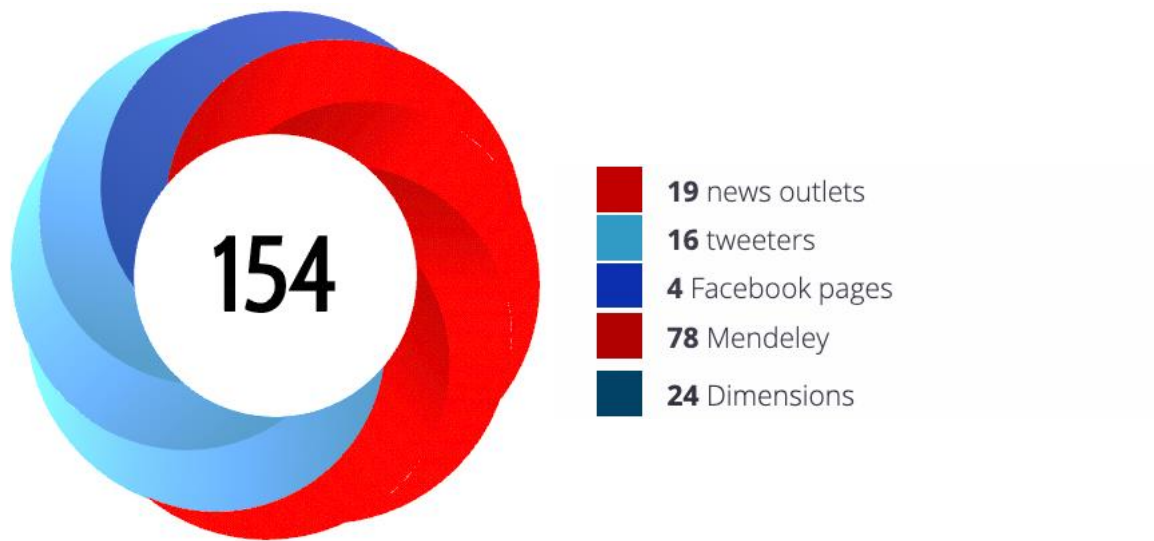

**Figure S1:** Overview of attention for the output of the five articles with the highest AAS. A) Transitions between Central and Peripheral Vision Create Spatial/Temporal Distortions: A Hypothesis Concerning the Perceived Break of the Curveball; B) Epidemiology of Sports-Related Eye Injuries in the United States; C) Vision and Vestibular System Dysfunction Predicts Prolonged Concussion Recovery in Children; D) What Do Football Players Look at? An Eye-Tracking Analysis of the Visual Fixations of Players in 11 v 11 Elite Football Match Play; E) Academic Difficulty and Vision Symptoms in Children with Concussion.
